# Supplementary material for: Oligogenic genetic variation of neurodegenerative disease genes in 980 postmortem human brains
Source: PubMed Central journal article supplement (PMC6204946; doi:10.1136/jnnp-2017-317234), 2018-01-13
Supplement: jnnp-2017-317234supp001.pdf [file jnnp-2017-317234supp001.pdf]

# SUPPLEMENTARY FILE

## SUPPLEMENTARY METHODS

***Clinical stratification of cases:*** Demographic data (age of disease onset and death, disease duration and family history of disease), together with the *ante mortem* clinical diagnosis and *post mortem* neuropathological diagnosis were recorded for all cases. Quantitative neuropathological scores and stages (e.g. Braak neurofibrillary tangle stage [1]) were also supplied for each case as appropriate. Given the known neuropathological and genetic overlap, cases with either frontotemporal dementia (FTD), motor neuron disease (MND)/amyotrophic lateral sclerosis (ALS), were included together in an FTD-ALS group .

***Molecular genetic and bioinformatic analysis:*** DNA extraction, exome sequencing and variant interpretation were performed as previously described[2]. Briefly, DNA was extracted from either the cerebellum, cerebral cortex or basal ganglia. Automated DNA extraction was performed using a DNA extraction robot (Qiasymphony SP robot; Qiagen, Hilden, Germany). Tissue was lysed in 180 µl of ATL buffer (Qiagen, Hilden, Germany) and 20 µl of Proteinase K (Qiagen, Hilden, Germany). Lysates were incubated overnight at 56 °C and at 900 rpm before being loaded onto the Qiasymphony robot. Subsequent extraction was performed using the Qiasymphony DNA mini kit reagents (Qiagen, Hilden, Germany), as per manufacturers protocol. DNA yield was measured using the Nanodrop-8000 Spectrophotometer (NanoDrop Technologies).

**Exome sequencing and analysis:** Genomic DNA was fragmented, exome enriched and sequenced (Nextera Rapid Exome Capture 62Mb and HiSeq 2000, 100 bp paired-end reads). Bioinformatic analysis was performed using an in-house pipeline including alignment (human reference genome hg19, UCSC) using Burrows-Wheeler Aligner (BWA)[3]. Variant calling was performed using FreeBayes [4]. Subsequent analysis was restricted to on-target homozygous, heterozygous, and compound heterozygous variants with a minimum read depth of 10 in any case or control, and base quality score of 20 within the cohort. Further analysis was performed on frameshift, in-frame indel, or start/stop codon change, missense variants, and splice site loss variants with a minor allele frequency <1% or <5% in the 1000 Genome Project Database[5], European American cases from the NHLBI ESP exomes database[6 7], and ExAC server[8 9], using Qiagen Ingenuity Variant Analysis software.

**Variant interpretation:** Variants in genes known to cause familial forms of neurodegenerative disease with the appropriate inheritance pattern were previously assessed in all cases according to both the 2015 American College of Medical Genetics (ACMG) [10], and the MacArthur Criteria [11], irrespective of phenotype or neuropathological diagnosis. The ACMG criteria are the primary established criteria for the interpretation of sequencing variants in a clinical context, and the MacArthur criteria are a second stringent criteria that propose that researchers summarise and present a spectrum of evidence in order to truly attribute pathogenicity of identified alleles in sequencing studies.

*Ante mortem* clinical and *post mortem* pathological data were reviewed for all cases, together with the collation of the MacArthur criteria. Variants were

then classified as either Pathogenic, Likely Pathogenic, of Uncertain Significance, Likely to be benign, or Benign according to the ACMG criteria based on this data and their presence in an appropriate phenotype and with appropriate corresponding pathology. Importantly, each allele was assessed at the allele level, and no consideration was taken as to whether a previous pathogenic allele or risk factor had been identified within that individual.

*Defining 'oligogenic' individuals;* Individuals with >1 non-synonymous variant (either heterozygous or homozygous) within a their respective panel of genes were classified as 'oligogenic'. This included heterozygous variants in genes that cause monogenic forms of disease in the heterozygous state and those genes that act as known risk factors.

#### **Discussion of oligogenic cases detected by Cady et al[12].**

Cady et al[12] identified 18 cases which had oligogenic variation in their study in 2015. By the authors own criteria two of these cases were likely to be homozygous recessive mutations; *SOD1* p.D91A and *SETX* p.I2547T, and two potential compound heterozygous cases; *SETX* p.C1554G and p.R168Q, and *SETX* p.I2547T and p.T14I were also present. They also had 3 individuals with the pathogenic *C9orf72* hexanucleotide repeat expansion[13], one individual with the pathogenic heterozygous *FUS* p.P525L mutation[14 15], and one with the pathogenic heterozygous *SOD1* p.G38R mutation[16]. Taken together, we therefore suggest that at least 10 of their putative 18 oligogenic cases therefore have genetically determined forms of disease caused by a single allele rather than through a synergistic effect. Without knowing the nature of the rest of their cohort, given that the vast majority of cases were clinically sporadic (89.3%) it is

highly likely that the 55.6% of monogenic cases within the oligogenic cohort was significantly in excess of that observed in the non-oligogenic cohort.

## SUPPLEMENTARY FIGURES

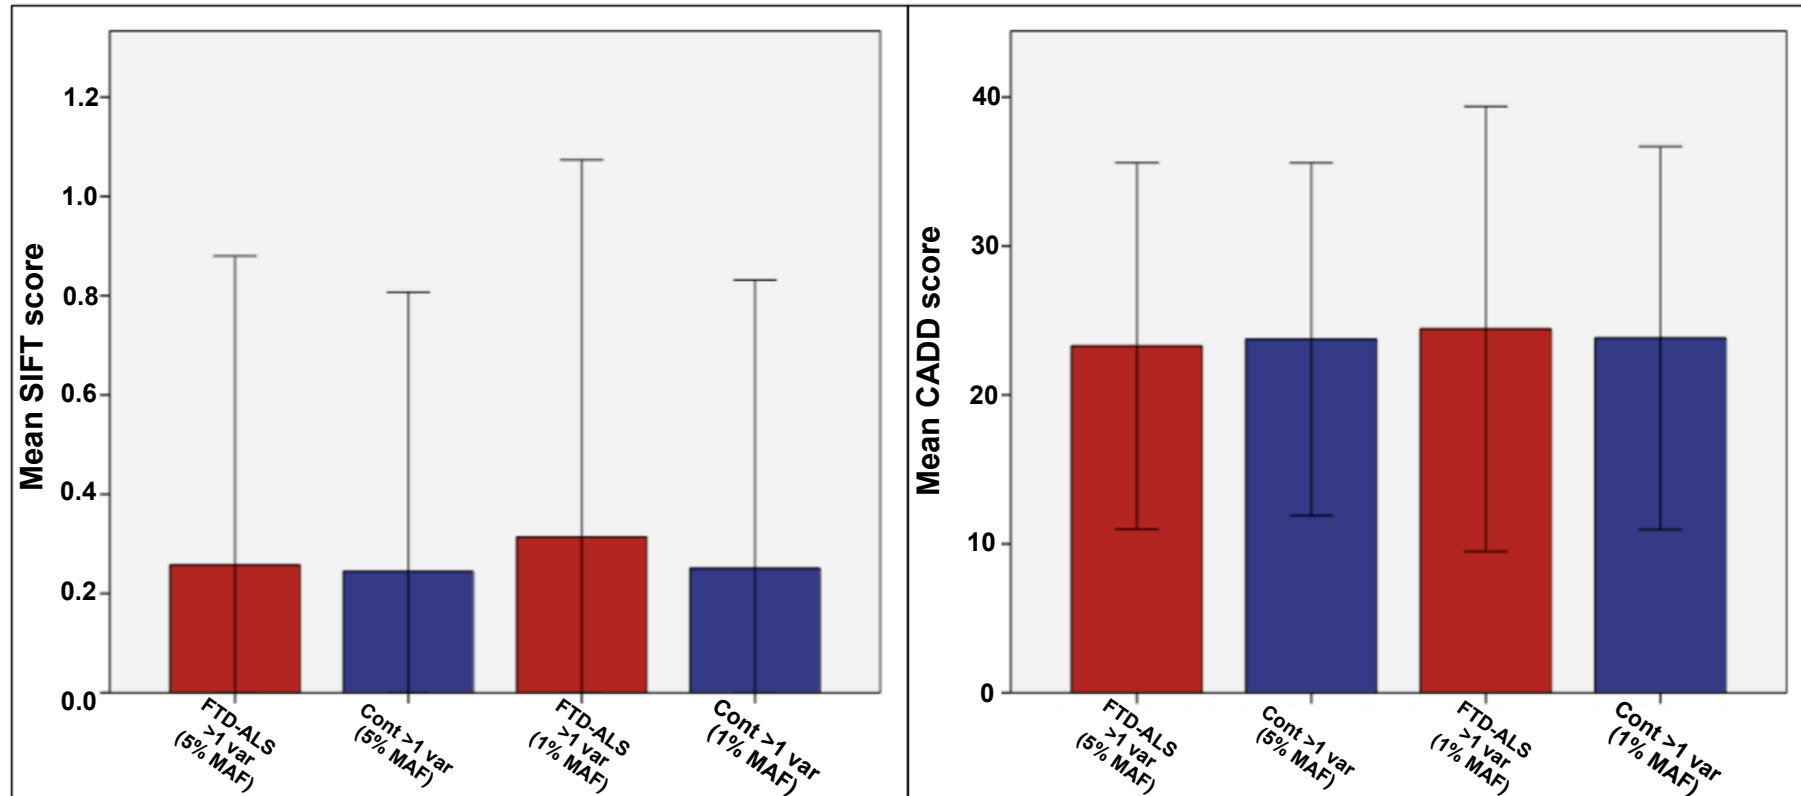

**Supplementary figure 1.** Mean SIFT and CADD *in-silico* pathogenicity scores for variants in FTD-ALS cases (n=X) and controls (n=362) who have >1 variant, and of which neither variant was deemed to be either a pathogenic, or likely pathogenic variant based on ACMG criteria, nor an established risk factor for disease. There were no significant differences between cases or controls in either criteria at the 5% MAF or 1% MAF threshold ( $p>0.05$ , un-paired t-test). Error bars indicate standard deviation from mean.

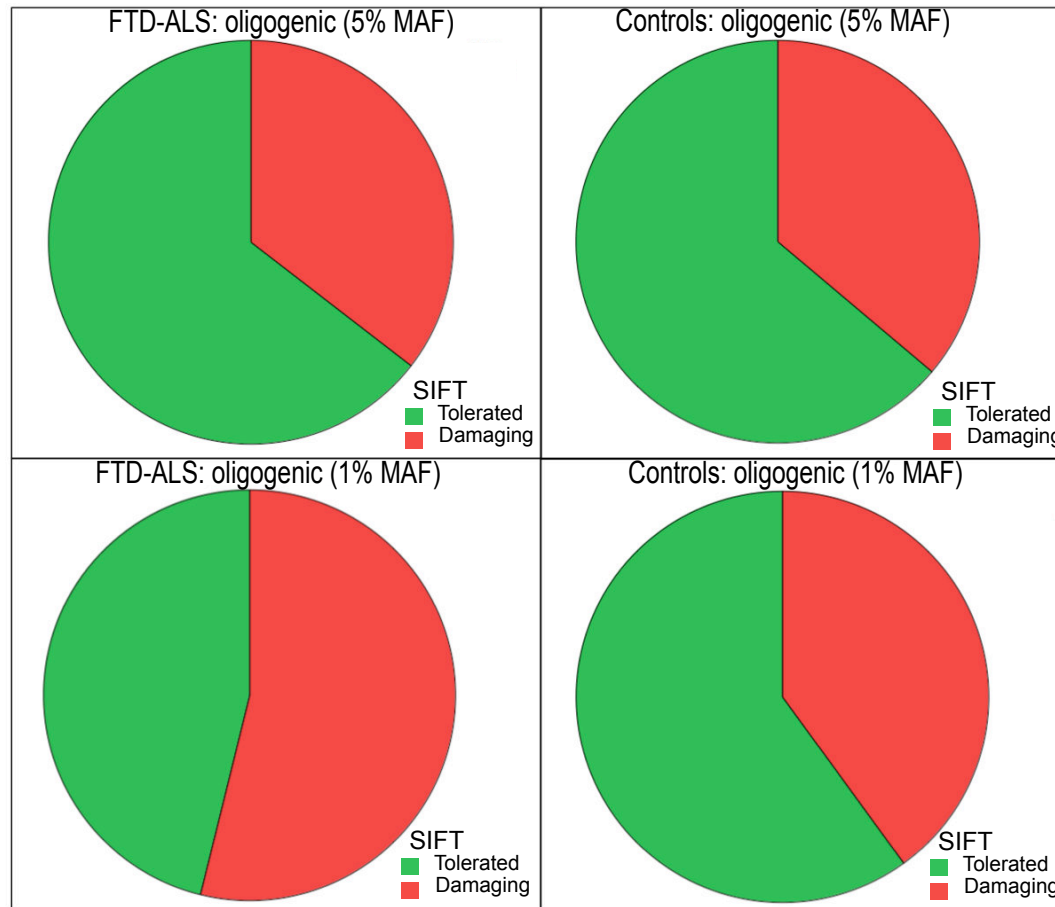

**Supplementary figure 2.** The proportion of predicted damaging and tolerant SIFT *in-silico* pathogenicity scores for variants in FTD-ALS cases (n=211) and controls (n=362) who have >1 variant, and of which neither variant was deemed to be either a pathogenic, or likely pathogenic variant based on ACMG criteria, nor an established risk factor for disease. There were no significant differences between cases or controls in either criteria at the 5% MAF or 1% MAF threshold (P.0.05, Fisher's exact test).

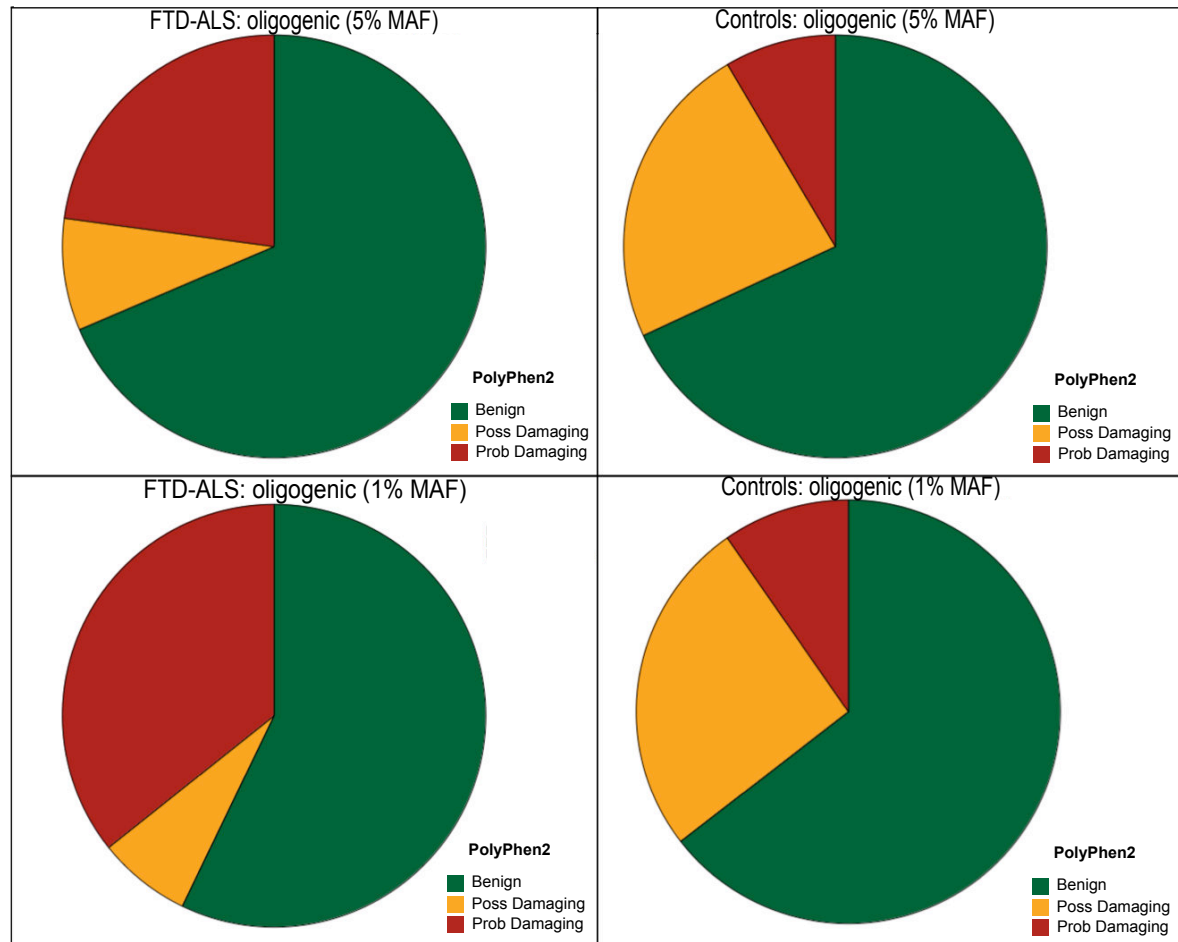

**Supplementary figure 3.** The proportion of predicted benign, possibly damaging or damaging with PolyPhen2 for variants in FTD-ALS cases (n=211) and controls (n=362) who have >1 variant, and of which neither variant was deemed to be either a pathogenic, or likely pathogenic variant based on ACMG criteria, nor an established risk factor for disease. There were no significant differences between cases or controls in either criteria at the 5% MAF or 1% MAF threshold (P.0.05, Fisher's exact test).

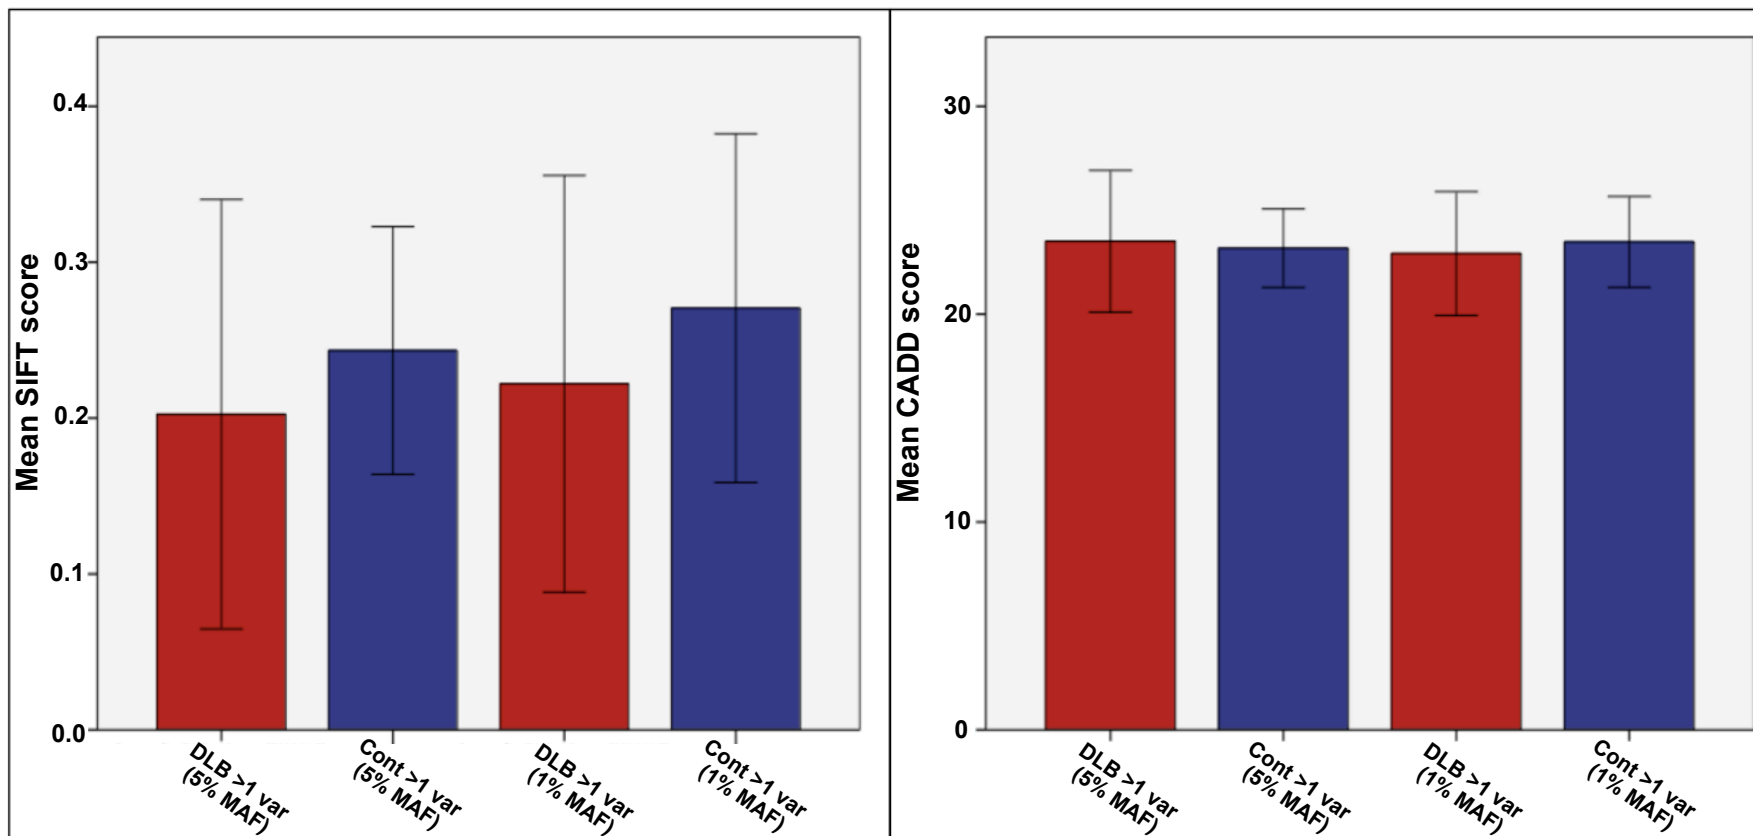

**Supplementary figure 4.** Mean SIFT and CADD *in-silico* pathogenicity scores for variants in PD-DLB cases (n=97) and controls (n=362) who have >1 variant, and of which neither variant was deemed to be either a pathogenic, or likely pathogenic variant based on ACMG criteria, nor an established risk factor for disease. There were no significant differences between cases or controls in either criteria at the 5% MAF or 1% MAF threshold ( $p>0.05$ , un-paired t-test). Error bars indicate standard deviation from mean.



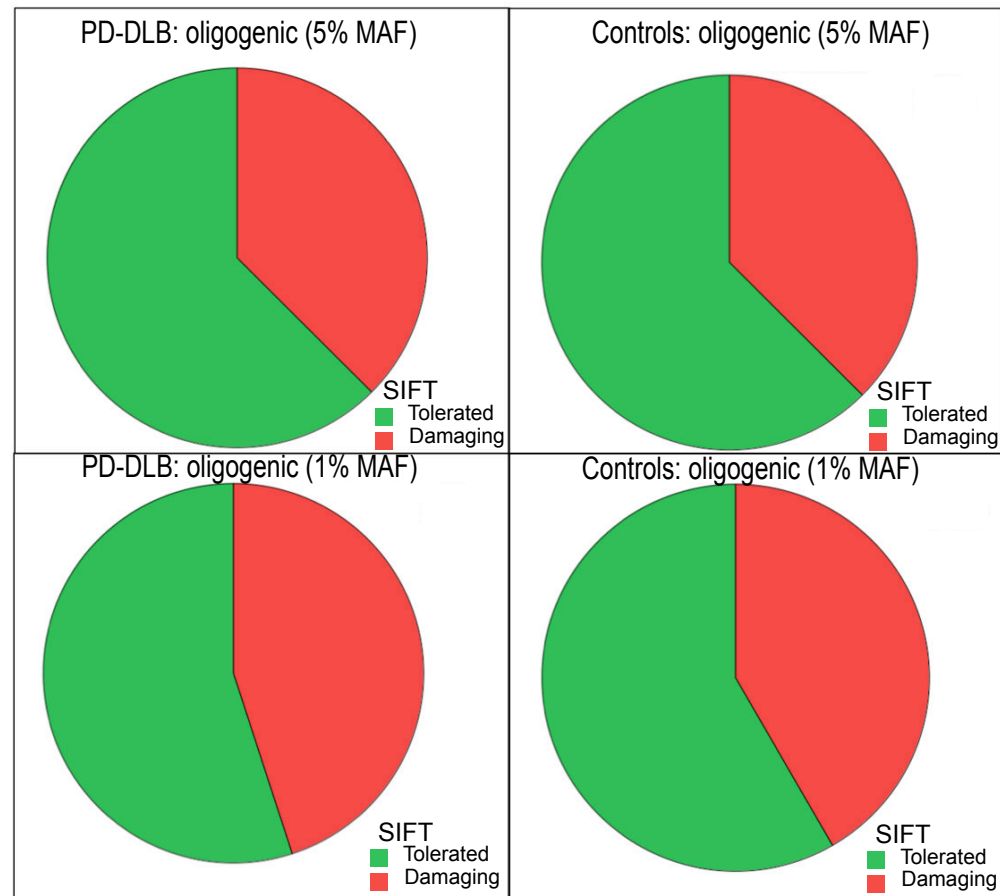

**Supplementary figure 5.** The proportion of predicted damaging and tolerant SIFT *in-silico* pathogenicity scores for variants in PD-DLB (n=97) and controls (n=362) who have >1 variant, and of which neither variant was deemed to be either a pathogenic, or likely pathogenic variant based on ACMG criteria, nor an established risk factor for disease. There were no significant differences between cases or controls in either criteria at the 5% MAF or 1% MAF threshold (P.0.05, Fisher's exact test).

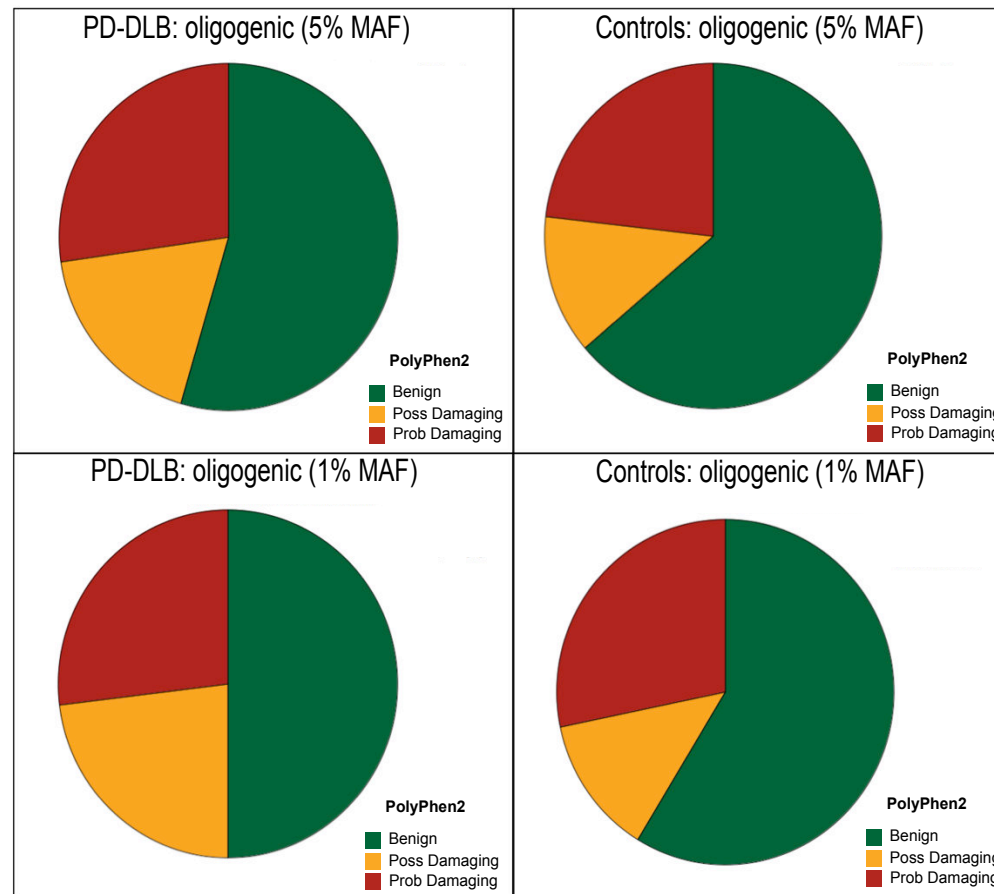

**Supplementary figure 6.** The proportion of predicted benign, possibly damaging or damaging with PolyPhen2 for variants in PD-DLB cases (n=97) and controls (n=362) who have >1 variant, and of which neither variant was deemed to be either a pathogenic, or likely pathogenic variant based on ACMG criteria, nor an established risk factor for disease. There were no significant differences between cases or controls in either criteria at the 5% MAF or 1% MAF threshold (P.0.05, Fisher's exact test).

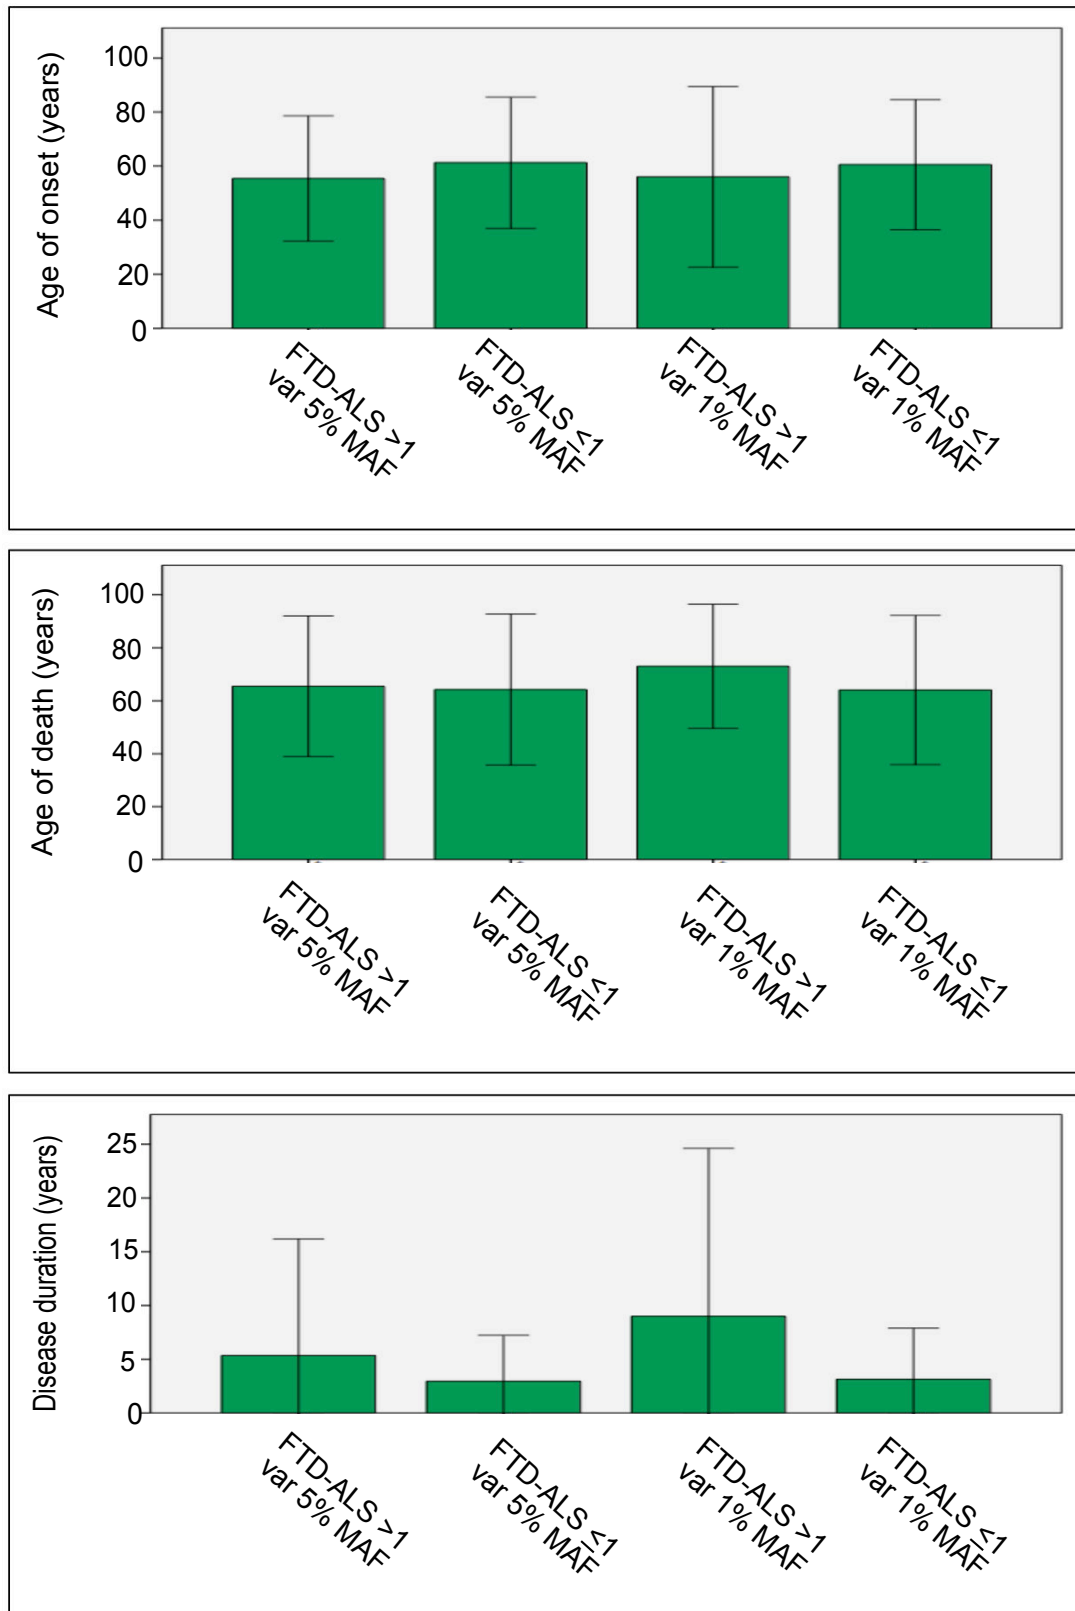

**Supplementary figure 7.** Mean age of disease onset (top panel), death (middle panel) and mean disease duration (bottom panel) for all cases that have either  $\geq 2$  variants in the FTD-ALS gene panel ( $n=28$ ) at the defined MAF threshold, compared to those with  $\leq 1$  variant. There were no differences between cohorts for any criteria. Error bars indicate standard deviation from mean.

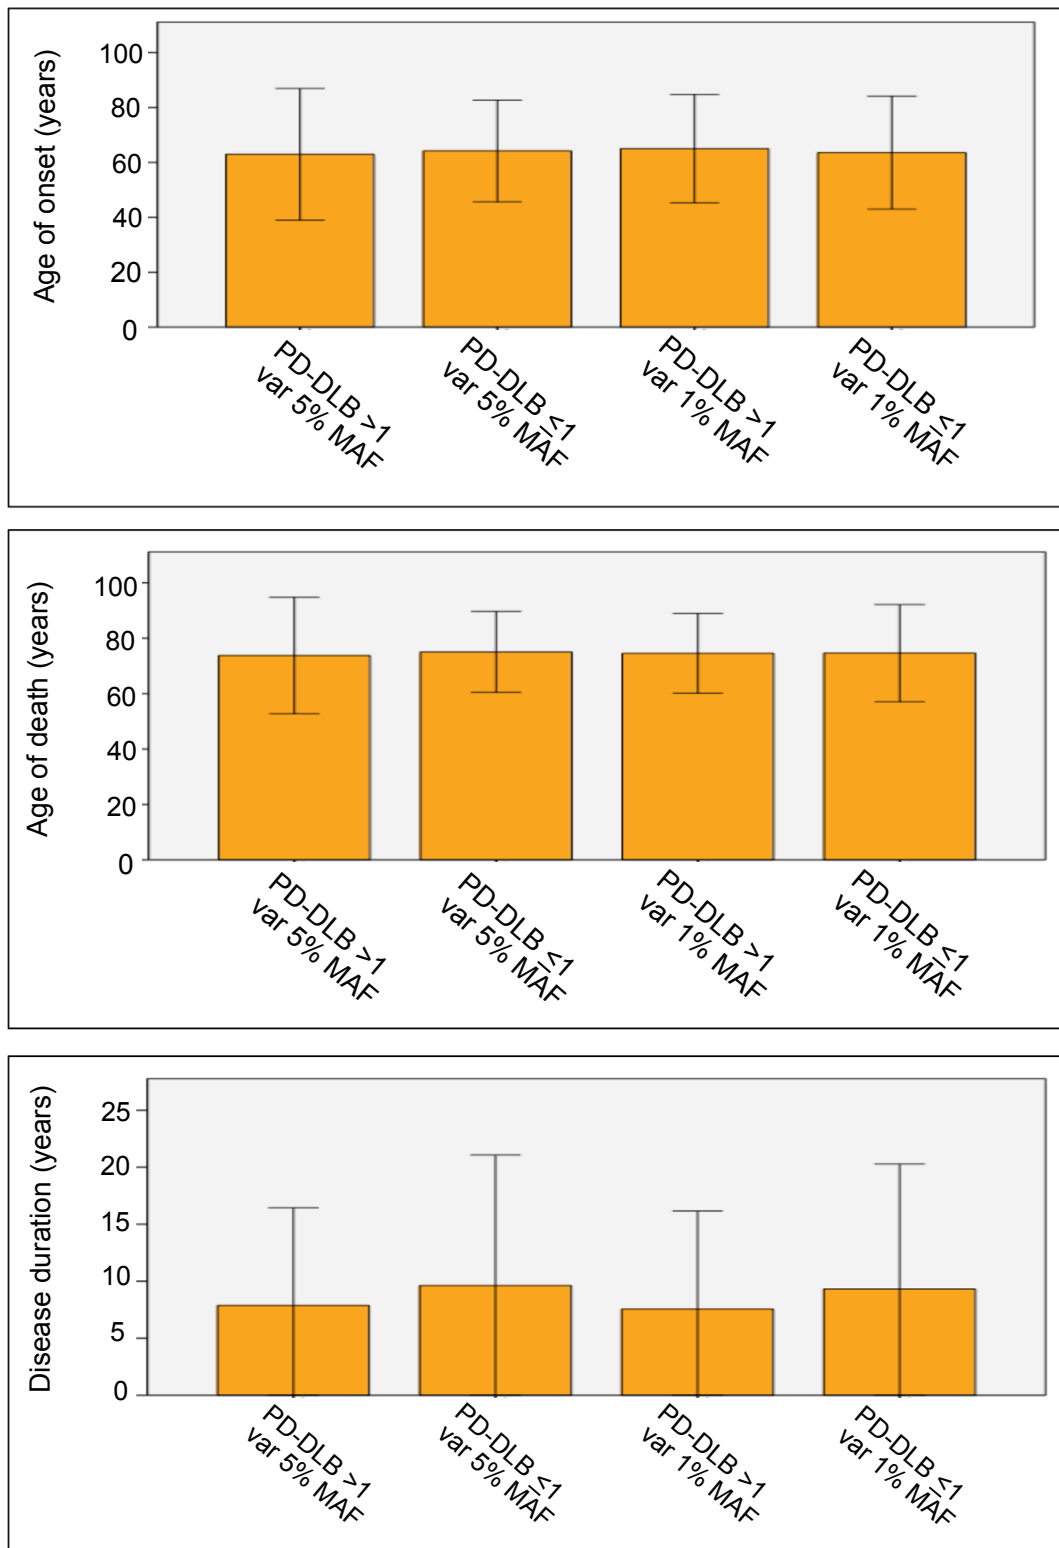

**Supplementary figure 8.** The mean age of disease onset (top panel), death (middle panel) and mean disease duration (bottom panel) for all cases that have either  $\geq 2$  variants in the PD-DLB gene panel ( $n=20$ ) at the defined MAF threshold, compared to

those with  $\leq 1$  variant. There were no differences between cohorts for any criteria. Error bars indicate standard deviation from mean.

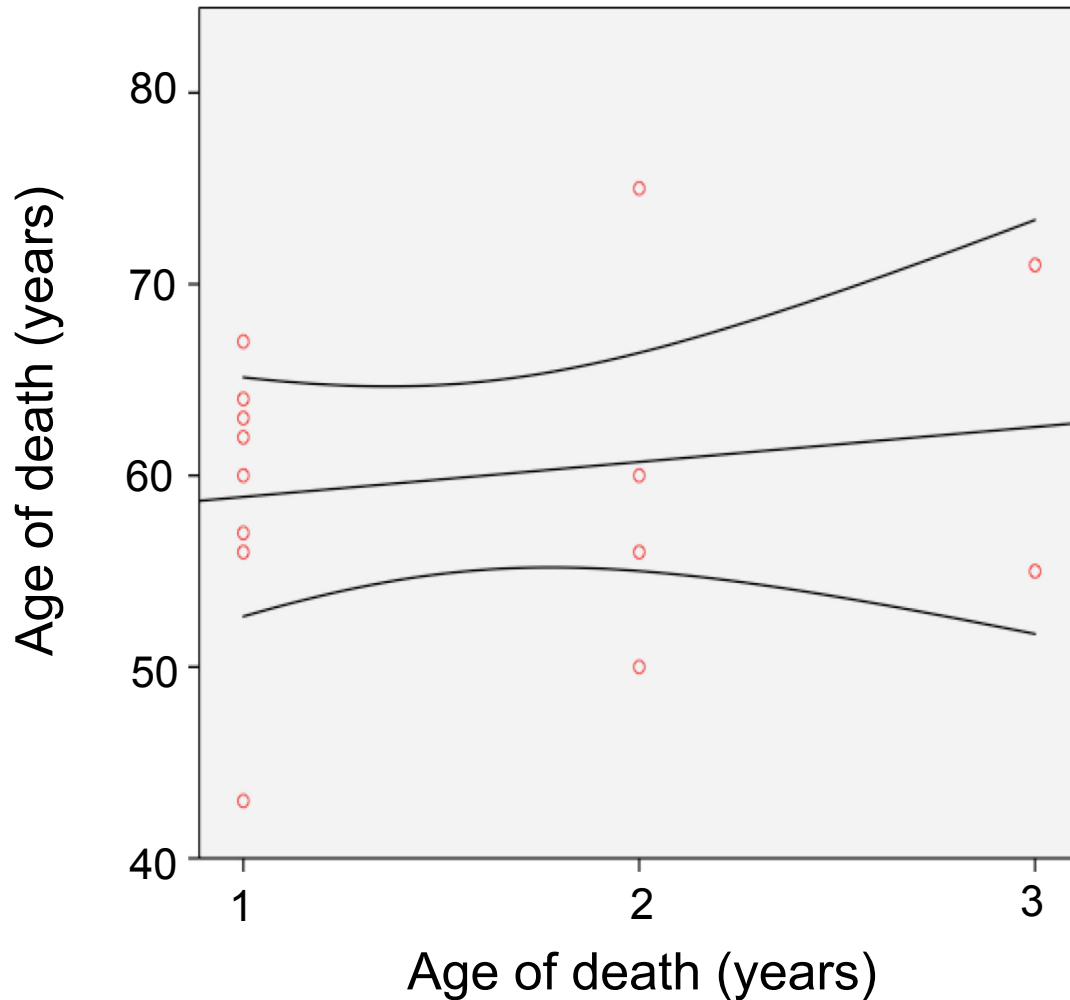

**Supplementary figure 9.** The mean age of death for all cases (n=14) that carried the C9orf72 mutation against the number of additional non-synonymous variants they possessed within the full FTD-ALS panel at 1% MAF. The line of best fit together with 95% CI is shown. There was no association between the age of death and the number of variants ( $r^2 = 0.0064$ ).

## SUPPLEMENTARY TABLES

| <b>Phenotype</b> | <b>Number of cases</b> | <b>Male (number)</b> | <b>Female (number)</b> | <b>Mean age onset</b> | <b>Mean age death</b> | <b>Number with FH</b> |
|------------------|------------------------|----------------------|------------------------|-----------------------|-----------------------|-----------------------|
| <b>Control</b>   | 362                    | 232 (64.1)           | 130 (35.9)             | N/A                   | 63.3 (18.8)           | N/A                   |
| <b>AD</b>        | 277                    | 131 (47.3)           | 146 (52.7)             | 65.4 (10.2)           | 77.7 (11.7)           | 11                    |
| <b>FTD-ALS</b>   | 244                    | 143 (58.6)           | 101 (41.4)             | 59.4 (11.8)           | 64.6 (11.7)           | 14                    |
| <b>DLB</b>       | 58                     | 36 (62.1)            | 22 (37.9)              | 66.7 (8.4)            | 76.7 (7.0)            | 2                     |
| <b>PD</b>        | 39                     | 28 (71.8)            | 11 (28.2)              | 59.9 (10.9)           | 72.3 (9.2)            | 0                     |

**Supplementary table 1.** Clinical and demographic data for all disease cohorts.

| Gene      | Disease   | Inheritance | Full panel | AD panel | PD-DLB panel | Full FTD-ALS panel (n=28 genes) | Medium FTD-ALS panel (n=12 genes) | Small FTD-ALS panel (n=5 genes) |
|-----------|-----------|-------------|------------|----------|--------------|---------------------------------|-----------------------------------|---------------------------------|
| SNCA      | PD        | AD/RF       | Y          |          | Y            |                                 |                                   |                                 |
| PARK2     | PD        | AR          | Y          |          | Y            |                                 |                                   |                                 |
| PINK1     | PD        | AR          | Y          |          | Y            |                                 |                                   |                                 |
| EIF4G1    | PD        | AD          | Y          |          | Y            |                                 |                                   |                                 |
| GIGYF2    | PD        | AD/RF       | Y          |          | Y            |                                 |                                   |                                 |
| HTRA2     | PD/AD     | AD          | Y          | Y        | Y            |                                 |                                   |                                 |
| UCHL      | PD        | AD          | Y          |          | Y            |                                 |                                   |                                 |
| SPG11     | PD        | AR          | Y          |          | Y            |                                 |                                   |                                 |
| VPS35     | PD        | AD          | Y          |          | Y            |                                 |                                   |                                 |
| FBX07     | PD        | AR          | Y          |          | Y            |                                 |                                   |                                 |
| APP       | AD        | AD          | Y          | Y        | Y            |                                 |                                   |                                 |
| PSEN1     | AD        | AD          | Y          | Y        | Y            |                                 |                                   |                                 |
| PSEN2     | AD        | AD          | Y          | Y        | Y            |                                 |                                   |                                 |
| c9orf72   | FTD / ALS | AD          | Y          |          |              | Y                               |                                   | Y                               |
| GRN       | FTD/AD    | AD          | Y          | Y        | Y            | Y                               |                                   |                                 |
| CHCHD10   | FTD       | AD          | Y          |          |              | Y                               |                                   |                                 |
| TARDBP    | FTD       | AD          | Y          |          |              | Y                               | Y                                 | Y                               |
| SOD1      | ALS       | AD/AR       | Y          |          |              | Y                               | Y                                 | Y                               |
| FUS       | ALS       | AD          | Y          |          |              | Y                               | Y                                 | Y                               |
| PFN1      | ALS       | AD          | Y          |          |              | Y                               | Y                                 |                                 |
| hnRNPA2B1 | ALS       | AD          | Y          |          |              | Y                               |                                   |                                 |
| hnRNPA1   | ALS       | AD          | Y          |          |              | Y                               |                                   |                                 |
| SETX      | ALS       | AR          | Y          |          |              | Y                               | Y                                 |                                 |
| VAPB      | ALS       | AD          | Y          |          |              | Y                               | Y                                 |                                 |
| OPTN      | ALS       | AR          | Y          |          |              | Y                               | Y                                 |                                 |
| VCP       | ALS       | AD          | Y          |          |              | Y                               | Y                                 |                                 |
| DAO       | ALS       | AD          | Y          |          |              | Y                               | Y                                 |                                 |
| ANG       | ALS       | AD          | Y          |          |              | Y                               | Y                                 | Y                               |
| DCTN1     | ALS       | AD          | Y          |          |              | Y                               | Y                                 |                                 |
| PARK7     | PD        | AR          | Y          |          |              |                                 |                                   |                                 |
| CHMP2B    | FTD/ALS   | AD          | Y          |          |              | Y                               |                                   |                                 |
| SQSTM1    | FTD/ALS   | AD/RF       | Y          |          |              | Y                               | Y                                 |                                 |
| PRPH      | ALS       | AR          | Y          |          |              | Y                               |                                   |                                 |
| DPP6      | ALS       | AR          | Y          |          |              | Y                               |                                   |                                 |
| MATR3     | ALS       | AD          | Y          |          |              | Y                               |                                   |                                 |
| MAPT      | FTD/AD    | AD          | Y          | Y        | Y            | Y                               |                                   |                                 |
| ALS2      | ALS       | AR          | Y          |          |              | Y                               |                                   |                                 |
| SIGMAR1   | ALS       | AD          | Y          |          |              | Y                               |                                   |                                 |
| UBQLN2    | FTD       | XLD         | Y          |          |              | Y                               |                                   |                                 |
| NOTCH3    | CADASIL   | AD          | Y          |          |              |                                 |                                   |                                 |
| PRNP      | fcJD      | AD          | Y          |          |              |                                 |                                   |                                 |
| COQ2      | MSA       | AD/AR       | Y          |          |              | Y                               |                                   |                                 |
| GBA       | DLB       | RF          | Y          |          | Y            |                                 |                                   |                                 |
| LRRK2     | PD/DLB    | RF          | Y          |          | Y            |                                 |                                   |                                 |
| TREM2     | AD        | RF          | Y          | Y        | Y            |                                 |                                   |                                 |
| SCARB2    | DLB       | RF          | Y          |          | Y            |                                 |                                   |                                 |
| PON1      | ALS       | RF          | Y          |          |              | Y                               |                                   |                                 |
| PON3      | ALS       | RF          | Y          |          |              | Y                               |                                   |                                 |
| APOE      | AD        | RF          | Y          | Y        | Y            |                                 |                                   |                                 |

**Supplementary table 2.** A table of all genes included in each panel in the study, and as indicated in the text.

| Panel                                     | Total disease cohort | Disease cases with >1 variant | % of cases >1 variant | Control cohort size | Control cases with >1 variant | Percentage of controls with >1 variant | Fisher's test (cases with >1 variant vs controls) | Fisher's test (cases with >1 variant vs controls) after monogenic or RG cases removed |
|-------------------------------------------|----------------------|-------------------------------|-----------------------|---------------------|-------------------------------|----------------------------------------|---------------------------------------------------|---------------------------------------------------------------------------------------|
| >1 variant: full FTD-ALS panel (MAF 5%)   | 244                  | 48                            | 19.67                 | 362                 | 48                            | 13.26                                  | <b>0.04</b>                                       | 0.45                                                                                  |
| >1 variant: full FTD-ALS panel (MAF 5%)   | 244                  | 43                            | 17.62                 | 362                 | 48                            | 13.26                                  | 0.164                                             | 0.45                                                                                  |
| >1 variant: full FTD-ALS panel (MAF 1%)   | 244                  | 19                            | 7.79                  | 362                 | 26                            | 7.18                                   | 0.875                                             | 0.14                                                                                  |
| >1 variant: full FTD-ALS panel (MAF 1%)   | 244                  | 15                            | 6.15                  | 362                 | 26                            | 7.18                                   | 0.742                                             | 0.14                                                                                  |
| >1 variant: medium FTD-ALS panel (MAF 5%) | 244                  | 15                            | 6.15                  | 362                 | 15                            | 4.14                                   | 0.258                                             | 0.50                                                                                  |
| >1 variant: medium FTD-ALS panel (MAF 5%) | 244                  | 11                            | 4.51                  | 362                 | 15                            | 4.14                                   | 0.839                                             | 0.82                                                                                  |
| >1 variant: medium FTD-ALS panel (MAF 1%) | 244                  | 7                             | 2.87                  | 362                 | 8                             | 2.21                                   | 0.61                                              | 0.34                                                                                  |
| >1 variant: medium FTD-ALS panel (MAF 1%) | 244                  | 4                             | 1.64                  | 362                 | 8                             | 2.21                                   | 0.77                                              | 0.34                                                                                  |
| >1 variant: AD panel (MAF 5%)             | 277                  | 8                             | 2.89                  | 362                 | 10                            | 2.76                                   | 1                                                 | 0.057                                                                                 |
| >1 variant: AD panel (MAF 1%)             | 277                  | 6                             | 2.17                  | 362                 | 8                             | 2.21                                   | 1                                                 | 0.16                                                                                  |
| >1 variant: PD-DLB panel (MAF 5%)         | 97                   | 39                            | 40.21                 | 362                 | 92                            | 25.41                                  | <b>0.0002</b>                                     | 0.70                                                                                  |
| >1 variant: PD-DLB panel (MAF 1%)         | 97                   | 23                            | 23.71                 | 362                 | 37                            | 10.22                                  | <b>0.0011</b>                                     | 0.363                                                                                 |

**Supplementary table 3.** A table of the number and frequency of cases with >1 variant in each cohort and in each panel in the study. The proportion of cases with >1 variant in cases compared to controls were first tested before re-testing was performed after the removal of cases that harbour pathogenic variants, likely pathogenic variants, or known disease risk factors.



| Panel                                     | C9orf72 (inc/ex) | Cohort (n) | Number of monogenic or RF carriers | Oligogenic cases (>1 variant) | Number of carriers within oligogenic cases | Fisher's test (p-value) |
|-------------------------------------------|------------------|------------|------------------------------------|-------------------------------|--------------------------------------------|-------------------------|
| >1 variant: full FTD-ALS panel (MAF 5%)   | inc              | 244        | 33                                 | 48                            | 17                                         | 0.0001                  |
| >1 variant: full FTD-ALS panel (MAF 5%)   | ex               | 244        | 33                                 | 43                            | 12                                         | 0.0054                  |
| >1 variant: full FTD-ALS panel (MAF 1%)   | inc              | 244        | 33                                 | 19                            | 11                                         | 0.0001                  |
| >1 variant: full FTD-ALS panel (MAF 1%)   | ex               | 244        | 33                                 | 15                            | 7                                          | 0.0013                  |
| >1 variant: medium FTD-ALS panel (MAF 5%) | inc              | 244        | 33                                 | 15                            | 9                                          | 0.0001                  |
| >1 variant: medium FTD-ALS panel (MAF 5%) | ex               | 244        | 33                                 | 11                            | 4                                          | 0.0461                  |
| >1 variant: medium FTD-ALS panel (MAF 1%) | inc              | 244        | 33                                 | 7                             | 5                                          | 0.0006                  |
| >1 variant: medium FTD-ALS panel (MAF 1%) | ex               | 244        | 33                                 | 4                             | 2                                          | 0.0895                  |
| >1 variant: AD panel (MAF 5%)             |                  | 277        | 36                                 | 8                             | 7                                          | 0.0001                  |
| >1 variant: AD panel (MAF 1%)             |                  | 277        | 36                                 | 6                             | 6                                          | 0.0001                  |
| >1 variant: PD-DLB panel (MAF 5%)         |                  | 97         | 16                                 | 39                            | 12                                         | 0.004                   |
| >1 variant: PD-DLB panel (MAF 1%)         |                  | 97         | 16                                 | 23                            | 10                                         | 0.0003                  |

**Supplementary table 4.** A table highlighting the enrichment of cases harbouring established monogenic or risk factor cases within cases that harbour >1 variant.

|                           | >1 variant: full FTD-ALS panel (5% MAF) |                   | >1 variant: full FTD-ALS panel (1% MAF) |                   | >1 variant: medium FTD-ALS panel (5% MAF) |                   | >1 variant: medium FTD-ALS panel (1% MAF) |                   | >1 variant in AD panel (5% MAF) | >1 variant in AD panel (1% MAF) | >1 variant in PD-DLB panel (5% MAF) | >1 variant in PD-DLB panel (1% MAF) |
|---------------------------|-----------------------------------------|-------------------|-----------------------------------------|-------------------|-------------------------------------------|-------------------|-------------------------------------------|-------------------|---------------------------------|---------------------------------|-------------------------------------|-------------------------------------|
|                           | inc <i>C9orf72</i>                      | ex <i>C9orf72</i> | inc <i>C9orf72</i>                      | ex <i>C9orf72</i> | inc <i>C9orf72</i>                        | ex <i>C9orf72</i> | inc <i>C9orf72</i>                        | ex <i>C9orf72</i> | N/A                             |                                 |                                     |                                     |
| <b>Sensitivity (%)</b>    | 51.50                                   | 36.36             | 33.33                                   | 21.21             | 27.27                                     | 12.12             | 15.15                                     | 6.06              | 19.44                           | 16.67                           | 75.00                               | 62.50                               |
| <b>95% Sensitivity CI</b> | 33.50-69.20                             | 20.40-54.88       | 17.96-51.83                             | 8.98-38.91        | 13.30-45.52                               | 3.40-28.20        | 5.11-31.90                                | 0.74-20.23        | 8.19-36.02                      | 6.37-32.81                      | 47.62-92.73                         | 35.43-84.80                         |
| <b>Specificity (%)</b>    | 85.30                                   | 86.64             | 96.21                                   | 96.21             | 97.16                                     | 96.68             | 99.05                                     | 99.05             | 99.59                           | 100.00                          | 66.67                               | 83.95                               |
| <b>95% specificity CI</b> | 79.80-89.80                             | 81.57-90.74       | 92.67-98.35                             | 92.67-98.35       | 93.91-98.95                               | 93.28-98.66       | 96.62-99.89                               | 96.62-99.89       | 97.71-99.99                     | 98.48-100                       | 55.32-76.76                         | 74.12-91.17                         |
| <b>PLR</b>                | 3.50                                    | 2.72              | 8.79                                    | 5.59              | 9.59                                      | 3.65              | 15.98                                     | 6.39              | 46.86                           |                                 | 2.25                                | 3.89                                |
| <b>95% PLR CI</b>         | 2.2-5.6                                 | 1.56-4.75         | 3.82-20.23                              | 2.17-14.40        | 3.65-25.19                                | 1.13-11.80        | 3.23-79.04                                | 0.93-43.85        | 5.94-369.83                     |                                 | 1.48-3.42                           | 2.08-7.28                           |
| <b>NLR</b>                | 0.57                                    | 0.73              | 0.69                                    | 0.82              | 0.75                                      | 0.91              | 0.86                                      | 0.95              | 0.81                            | 0.83                            | 0.38                                | 0.45                                |
| <b>95% NLR CI</b>         | 0.40-0.81                               | 0.56-0.96         | 0.54-0.88                               | 0.68-0.98         | 0.61-0.92                                 | 0.80-1.03         | 0.74-0.99                                 | 0.87-1.04         | 0.69-0.95                       | 0.72-0.96                       | 0.16-0.89                           | 0.24-0.87                           |
| <b>PPV (%)</b>            | 35.42                                   | 27.91             | 57.89                                   | 46.67             | 60.00                                     | 36.36             | 71.34                                     | 50.00             | 87.50                           | 100.00                          | 30.77                               | 43.48                               |
| <b>95% PPV CI</b>         | 22.16-50.54                             | 15.33-43.67       | 33.50-79.75                             | 21.27-73.41       | 32.39-83.66                               | 10.93-69.21       | 29.04-96.33                               | 6.76-93.24        | 47.35-99.68                     | 54.07-100                       | 17.02-47.57                         | 23.19-65.51                         |
| <b>NPV (%)</b>            | 91.84                                   | 90.54             | 90.22                                   | 88.65             | 89.52                                     | 87.55             | 88.19                                     | 87.08             | 89.22                           | 88.93                           | 93.10                               | 91.89                               |
| <b>95% NPV CI</b>         | 87.08-95.26                             | 85.90-94.05       | 85.57-93.77                             | 83.81-92.45       | 84.81-93.17                               | 82.62-91.50       | 83.38-92.00                               | 82.17-91.05       | 84.89-92.66                     | 84.57-92.41                     | 83.27-98.09                         | 83.18-96.67                         |

**Supplementary table 5.** The sensitivity, specificity, Positive Likelihood Ratio (PLR), Negative Likelihood Ratio (NLR), Positive Predictive Value (PPV), and Negative Predictive Value (NPV) that an affected individual would have a highly penetrant allele, or risk factor for their disease upon the observation of >1 variant in the relevant panel at the relevant Minor Allele Frequency (MAF%) as indicated. These data are illustrated in Figure 1.

|                                                     | Controls<br>(n=362) | Controls<br>with $\geq 1$<br>variant. N<br>(%) | Total number<br>of monogenic<br>cases | Monogenic<br>cases with an<br>extra non-<br>pathogenic<br>variant | Percentage of<br>monogenic cases<br>with a non-<br>pathogenic variant | Fisher's test (p-<br>value) |
|-----------------------------------------------------|---------------------|------------------------------------------------|---------------------------------------|-------------------------------------------------------------------|-----------------------------------------------------------------------|-----------------------------|
| >1 variant: full FTD-ALS panel (MAF 5%) inc C9orf72 | 362                 | 174 (48.07)                                    | 33                                    | 12                                                                | 36.36                                                                 | 0.21                        |
| >1 variant: full FTD-ALS panel (MAF 5%)             | 362                 | 174 (48.07)                                    | 19                                    | 9                                                                 | 47.37                                                                 | 0.12                        |
| >1 variant: full FTD-ALS panel (MAF 1%) inc C9orf72 | 362                 | 117 (32.32)                                    | 33                                    | 9                                                                 | 27.27                                                                 | 0.68                        |
| >1 variant: full FTD-ALS genes (MAF 1%)             | 362                 | 117 (32.32)                                    | 19                                    | 7                                                                 | 36.84                                                                 | 0.80                        |
| > 1 variant: AD panel (MAF 5%)                      | 362                 | 78 (21.55)                                     | 36                                    | 7                                                                 | 19.44                                                                 | 1.00                        |
| > 1 variant: AD panel (MAF 1%)                      | 362                 | 50 (13.81)                                     | 36                                    | 6                                                                 | 16.67                                                                 | 0.62                        |
| > 1 variant: PD-DLB genes (MAF 5%)                  | 362                 | 229 (63.26)                                    | 16                                    | 12                                                                | 75.00                                                                 | 0.43                        |
| > 1 variant: PD-DLB genes (MAF 1%)                  | 362                 | 158 (43.64)                                    | 16                                    | 10                                                                | 62.50                                                                 | 0.20                        |

**Supplementary table 6.** Number of controls with any variant across the relevant disease panel at the relevant threshold. A Fisher's test was performed to see if cases containing a known monogenic or risk factor variant within that panel were more likely that controls to also have an additional non-pathogenic variant.

|                                    | Age of onset (years) |                  |         | Age of death (years) |               |         | Disease duration (years) |             |         |
|------------------------------------|----------------------|------------------|---------|----------------------|---------------|---------|--------------------------|-------------|---------|
|                                    | >1 variant           | ≤1 variant       | p-value | >1 variant           | ≤1 variant    | p-value | >1 variant               | ≤1 variant  | p-value |
| <b>FTD-ALS (MAF 5%) (mean, SD)</b> | 55.40<br>(11.60)     | 61.2<br>(12.10)  | 0.17    | 65.5 (13.30)         | 65.32 (11.60) | 0.94    | 10.70 (10.80)            | 5.90 (4.30) | 0.020   |
| <b>FTD-ALS (MAF 1%) (mean, SD)</b> | 56.00<br>(16.70)     | 60.5<br>(12.00)  | 0.54    | 73 (11.70)           | 65.04 (11.80) | 0.062   | 18.00 (15.60)            | 6.30 (4.80) | 0.00060 |
| <b>PD-DLB (MAF 5%) (mean, SD)</b>  | 62.97<br>(11.99)     | 64.18<br>(9.26)  | 0.989   | 73.77 (10.49)        | 75.05 (7.29)  | 0.54    | 7.87 (4.22)              | 9.62 (5.73) | 0.282   |
| <b>PD-DLB (MAF 1%) (mean, SD)</b>  | 66.1 (9.92)          | 63.30<br>(10.22) | 0.432   | 75.54 (7.18)         | 74.64 (7.75)  | 0.97    | 7.56 (4.30)              | 9.32 (5.49) | 0.432   |

**Supplementary table 7.** Mean (SD) age of disease onset, death and duration for all cases in their relevant cohort after the removal of individuals with known highly penetrant alleles or disease risk factors. A longer disease duration was observed in cases of FTD-ALS with >1 variant compared to those with ≤ 1 variant.

| Case | Age onset | Age death | Disease duration | FH_of_disease | Monogenic? | Chromosome | Position  | Reference Allele | Sample Allele | Variation Type | Gene Symbol | Protein Variant | Variant interpretation | Translation Impact | SIFT Function Prediction | SIFT Score | PolyPhen-2 Function Prediction | CADD Score | Conservation phyloP p-value | ExAC Frequency |
|------|-----------|-----------|------------------|---------------|------------|------------|-----------|------------------|---------------|----------------|-------------|-----------------|------------------------|--------------------|--------------------------|------------|--------------------------------|------------|-----------------------------|----------------|
| 1    | 71        |           |                  | N             | Y          | 7          | 94944735  | A                | G             | SNV            | PON1        | p.L90P          | UC                     | missense           | D                        | 0          | PrD                            | 29.6       | 0.00003258                  | 0.028          |
|      |           |           |                  |               |            | 17         | 42430146  | G                | T             | SNV            | GRN         | p.A588S         | LB                     | missense           | D                        | 0.04       | B                              | 13.92      |                             | 0.046          |
|      |           |           |                  |               |            | 9          | C9orf72   |                  |               |                |             |                 |                        |                    |                          |            | P                              |            |                             |                |
| 2    | 74        |           |                  | N             | N          | 7          | 94928347  | G                | C             | SNV            | PON1        | p.T326R         | UC                     | missense           | T                        | 1          | B                              | 10.21      |                             | 0.001          |
|      |           |           |                  |               |            | 14         | 21161931  | A                | G             | SNV            | ANG         | p.I70V          | LB                     | missense           | T                        | 0.3        | B                              |            |                             | 0.061          |
| 3    | 83        |           |                  | N             | N          | 5          | 138665061 | C                | T             | SNV            | MATR3       | p.R553C;        | LB                     | missense           |                          |            | B                              | 23.1       |                             | 0.011          |
|      |           |           |                  |               |            | 12         | 49689404  | G                | T             | SNV            | PRPH        | p.D141Y         | UC                     | missense           | D                        | 0.01       | PoD                            | 27.4       | 0.0004159                   | 0.247          |
| 4    | 87        |           |                  | N             | N          | 2          | 74598723  | T                | C             | SNV            | DCTN1       | p.I159V;        | UC                     | missense           | T                        | 1          | B                              |            | 0.005445                    | 0.799          |
|      |           |           |                  |               |            | 9          | 35059655  |                  | T             | Ins            | VCP         | p.N616fs*12     | LB                     | frameshift         |                          |            |                                |            |                             |                |
|      |           |           |                  |               |            | 17         | 42429414  | G                | T             | SNV            | GRN         | p.C404F         | LB                     | missense           | D                        | 0          | PrD                            | 32         | 0.000005176                 |                |
|      |           |           |                  |               |            | 17         | 44067341  | C                | T             | SNV            | MAPT        | p.S427F         | B                      | missense           | D                        | 0.05       | PrD                            | 28.5       | 0.001259                    | 0.146          |
| 5    | 73        | 75        | 2                | N             | Y          | 9          | 135224754 | T                | C             | SNV            | SETX        | p.Y21C          | UC                     | missense           | D                        | 0          | PrD                            | 24         | 0.0004831                   | 0.001          |
|      |           |           |                  |               |            | 9          | C9orf72   |                  |               |                |             |                 |                        |                    |                          |            | P                              |            |                             |                |
| 6    | 41        | 77        | 36               | N             | N          | 9          | 35059655  |                  | T             | Ins            | VCP         | p.N616fs*12     | LB                     | frameshift         |                          |            |                                |            |                             |                |
|      |           |           |                  |               |            | 20         | 57016044  | TC               | T             | Del            | VAPB        | p.S160del       | LB                     | in-frame           |                          |            |                                |            |                             |                |
| 7    | 52        | 56        | 4                | N             | Y          | 7          | 94953733  | T                | C             | SNV            | PON1        | p.N19D          | UC                     | missense           | T                        | 0.51       | B                              |            |                             | 0.159          |
|      |           |           |                  |               |            | 9          | C9orf72   |                  |               |                |             |                 |                        |                    |                          |            | P                              |            |                             |                |
| 8    | 55        | 60        | 5                | Y             | Y          | 7          | 95024007  | G                | A             | SNV            | PON3        | p.R32*          | UC                     | stop gain          |                          |            |                                | 36         |                             | 0.142          |
|      |           |           |                  |               |            | 17         | 42426621  |                  | CCT           | G              | Ins         | GRN             | p.C31fs*35             | P                  | frameshift               |            |                                |            |                             |                |

|    |    |    |    |   |   |    |               |         |   |     |             |           |    |           |   |          |     |       |                 |       |
|----|----|----|----|---|---|----|---------------|---------|---|-----|-------------|-----------|----|-----------|---|----------|-----|-------|-----------------|-------|
| 9  | 57 | 60 | 3  | N | Y | 20 | 57016044      | TC<br>T |   | Del | VAPB        | p.S160del | LB | in-frame  |   |          |     |       |                 |       |
|    |    |    |    |   |   | 9  | C9orf72       |         |   |     |             |           |    |           |   |          | P   |       |                 |       |
| 10 | 53 | 63 | 10 | N | 0 | 5  | 17925097<br>1 | C       | T | SNV | SQSTM1      | p.R55C;   | US | missense  | D | 0        | PrD | 32    | 0.006209        | 0.003 |
|    |    |    |    |   |   | 7  | 94937419      | G       | A | SNV | PON1        | p.A201V   | UC | missense  | T | 0.4<br>7 | B   | 23.3  |                 |       |
| 11 | 49 | 50 | 1  | Y | Y | 9  | 13514002<br>0 | A       | G | SNV | SETX        | p.I2547T  | UC | missense  | T | 0.6<br>6 | B   |       |                 | 0.342 |
|    |    |    |    |   |   | 9  | C9orf72       |         |   |     |             |           |    |           |   |          | P   |       |                 |       |
| 12 | 74 | 82 | 8  | N | N | 9  | 34635620      | C       | A | SNV | SIGMAR1     | p.A155S   | UC | missense  |   |          |     | 22.7  |                 |       |
|    |    |    |    |   |   | 9  | 13514002<br>0 | A       | G | SNV | SETX        | p.I2547T  | UC | missense  | T | 0.6<br>6 | B   |       |                 |       |
| 13 |    | 71 |    | Y | Y | 2  | 20262586<br>2 | C       | A | SNV | ALS2        | p.R285S   | UC | missense  |   |          | B   |       |                 |       |
|    |    |    |    |   |   | 21 | 33039672      | T       | C | SNV | SOD1        | p.I114T   | P  | missense  | D | 0.0<br>1 | PrD | 26.3  | 0.0000333<br>4  |       |
| 14 |    | 55 |    | Y | Y | 5  | 17925218<br>4 | A       | G | SNV | SQSTM1      | p.K154E   | LB | missense  | T | 0.1<br>1 | B   | 24.4  |                 | 0.242 |
|    |    |    |    |   |   | 9  | 13522475<br>7 | C       | T | SNV | SETX        | p.R20H    | UC | missense  | T | 0.1<br>5 | B   |       |                 | 0.906 |
|    |    |    |    |   |   | 9  | C9orf72       |         |   |     |             |           |    |           |   |          | P   |       |                 |       |
| 15 |    | 62 |    | N | Y | 7  | 95024007      | G       | A | SNV | PON3        | p.R32*    | UC | stop gain |   |          |     | 36    |                 | 0.142 |
|    |    |    |    |   |   | 9  | 13522475<br>7 | C       | T | SNV | SETX        | p.R20H    | UC | missense  | T | 0.1<br>5 | B   |       |                 | 0.906 |
| 16 |    | 78 |    | N | Y | 12 | 54677634      | G       | C | SNV | HNRNPA<br>1 | p.G316R   | LP | missense  | D | 0.0<br>2 | PrD | 23.3  | 0.0000080<br>91 |       |
|    |    |    |    |   |   | 2  | 74592252      | C       | T | SNV | DCTN1       | p.R1042Q; | LB | missense  | T | 0.3<br>1 | PoD | 26.3  | 0.0000016<br>79 | 0.099 |
| 17 |    | 53 |    | N | N | 21 | 33039672      | T       | C | SNV | SOD1        | p.I114T   | P  | missense  | D | 0.0<br>1 | PrD | 26.3  | 0.0000333<br>4  |       |
|    |    |    |    |   |   | 9  | 34635679      | G       | A | SNV | SIGMAR1     | p.R188W;  | UC | missense  | D | 0.0<br>1 | PrD | 34    |                 | 0.778 |
| 18 |    | 65 |    | Y | N | 9  | 13520232<br>5 | A       | C | SNV | SETX        | p.C1554G  | UC | missense  | D | 0.0<br>3 | PrD | 21.6  | 0.000526        | 0.584 |
|    |    |    |    |   |   | 7  | 94953733      | T       | C | SNV | PON1        | p.N19D    | UC | missense  | T | 0.5<br>1 | B   |       |                 | 0.159 |
| 19 |    | 73 |    | N | Y | 17 | 42430146      | G       | T | SNV | GRN         | p.A588S   | LB | missense  | D | 0.0<br>4 | B   | 13.92 |                 | 0.046 |

|  |  |  |  |  |  |    |          |   |   |     |      |         |   |          |   |          |     |      |           |       |
|--|--|--|--|--|--|----|----------|---|---|-----|------|---------|---|----------|---|----------|-----|------|-----------|-------|
|  |  |  |  |  |  | 12 | 49689404 | G | T | SNV | PRPH | p.D141Y | P | missense | D | 0.0<br>1 | PoD | 27.4 | 0.0004159 | 0.247 |
|--|--|--|--|--|--|----|----------|---|---|-----|------|---------|---|----------|---|----------|-----|------|-----------|-------|

**Supplementary table 8.** All variants in FTD-ALS cases with >1 variant in the full gene panel (28 genes) at a threshold of 1% MAF. The age of onset, death and disease duration is shown where available, together with all variant data. Key - ACMG - American College of Medical Genetics, B- Benign, LB - Likely Benign, UC - Unclassified, US - Uncertain Significance, RF - Risk Factor, LP - Likely Pathogenic, P - Pathogenic, T - Tolerated, D - Deleterious.

| Case | Sub-phenotype | Age onset | Age death | Disease duration | FH of disease | McKeith Criteria | Monogenic ? | APOE genotype | Chromosome | Position  | Reference Allele | Sample Allele | Variation Type | Gene Symbol | Protein Variant | ACMG Variant interpretation | Translation Impact | SIFT Function Prediction | SIFT Score | PolyPhen-2 Function Prediction | CADD Score | Conservation phyloP p-value | ExAC Frequency |
|------|---------------|-----------|-----------|------------------|---------------|------------------|-------------|---------------|------------|-----------|------------------|---------------|----------------|-------------|-----------------|-----------------------------|--------------------|--------------------------|------------|--------------------------------|------------|-----------------------------|----------------|
| 1    | DLB           |           | 79        |                  |               | Neo              |             | 3/3           | 3          | 184046450 | A                | G             | SNV            | EIF4G1      | p.M1336V        | LB                          | missense           | D                        | 0.01       | PoD                            | 26.3       | 0.00001702                  | 0.022          |
|      |               |           |           |                  |               |                  |             |               | 17         | 42430146  | G                | T             | SNV            | GRN         | p.A588S         | LB                          | missense           | D                        | 0.04       | B                              | 13.92      |                             | 0.046          |
| 2    | DLB           |           | 81        |                  |               | Limbic           |             | 3/4           | 15         | 44865000  | T                | C             | SNV            | SPG11       | p.N2075S        | UC                          | missense           | T                        | 0.65       | B                              |            |                             | 0.259          |
|      |               |           |           |                  |               |                  |             |               | 17         | 42428756  | G                | C             | SNV            | GRN         | p.E287D         | LB                          | missense           | T                        | 0.32       | PoD                            | 23.9       |                             | 0.003          |
| 3    | DLB           | 86        | 88        | 2                |               | Neo              |             | 3/4           | 2          | 74759825  | G                | A             | SNV            | HTRA2       | p.G399S         | UC                          | missense           | D                        | 0.02       | PrD                            | 24.1       | 0.00052                     | 0.437          |
|      |               |           |           |                  |               |                  |             |               | 3          | 184044687 | C                | T             | SNV            | EIF4G1      | p.P1075L        | US                          | missense           | T                        | 0.14       | B                              | 26.6       | 0.000003873                 |                |
| 4    | PD            |           | 80        |                  |               |                  |             | 3/3           | 3          | 184046529 | T                | C             | SNV            | EIF4G1      | p.M1355T        | US                          | missense           | D                        | 0          | PrD                            | 26.8       | 0.0005649                   | 0.04           |
|      |               |           |           |                  |               |                  |             |               | 15         | 44949354  | C                | T             | SNV            | SPG11       | p.V270I         | UC                          | missense           | T                        | 0.09       | PoD                            | 23.6       | 0.0001435                   | 0.609          |
| 5    | DLB           | 73        | 78        | 5                |               |                  |             | 4/4           | 2          | 233712223 | T                | A             | SNV            | GIGYF2      | p.L1230Q        | LB                          | missense           | T                        | 0.4        | B                              |            |                             | 0.002          |
|      |               |           |           |                  |               |                  |             |               | 15         | 44907562  | T                | C             | SNV            | SPG11       | p.K1013E        | UC                          | missense           | T                        | 0.21       | B                              | 15.76      |                             | 0.993          |
| 6    | DLB           | 75        | 77        | 2                |               |                  |             | 3/3           | 2          | 233712223 | T                | A             | SNV            | GIGYF2      | p.L1230Q        | LB                          | missense           | T                        | 0.4        | B                              |            |                             | 0.002          |
|      |               |           |           |                  |               |                  |             |               | 6          | 41129207  | C                | T             | SNV            | TREM2       | p.R62H          | RF                          | missense           |                          |            | B                              | 11.11      |                             | 0.826          |
| 7    | PD            | 60        | 75        | 15               |               | Neo              |             | 3/4           | 1          | 227073271 | C                | T             | SNV            | PSEN2       | p.S130L         | LB                          | missense           | D                        | 0.02       | PoD                            | 31         | 0.00006714                  | 0.064          |
|      |               |           |           |                  |               |                  |             |               | 3          | 184041256 | G                | C             | SNV            | EIF4G1      | p.A717P         | LB                          | missense           | T                        | 0.3        | B                              | 15.94      |                             | 0.074          |
|      |               |           |           |                  |               |                  |             |               | 6          | 41129207  | C                | T             | SNV            | TREM2       | p.R62H          | RF                          | missense           |                          |            | B                              | 11.11      |                             | 0.826          |
| 8    | PD            | 68        | 77        | 9                |               | Neo              |             | 3/4           | 1          | 155206167 | C                | T             | SNV            | GBA         | p.E278K         | RF                          | missense           | T                        | 0.88       | B                              | 17.33      |                             | 0.979          |
|      |               |           |           |                  |               |                  |             |               | 6          | 162683724 | G                | T             | SNV            | PARK2       | p.A82E          | UC                          | missense           | T                        | 1          | B                              |            |                             | 0.472          |
|      |               |           |           |                  |               |                  |             |               | 19         | 45411110  | T                | C             | SNV            | APOE        | p.L46P          | RF                          | missense           | T                        | 0.07       | PoD                            | 11.43      |                             | 0.242          |
| 9    | DLB           | 57        | 69        | 12               |               | Limbic           |             | 3/3           | 12         | 40713856  | G                | C             | SNV            | LRRK2       | p.E1632Q        | UC                          | missense           |                          |            | PrD                            | 24.3       | 0.000002056                 |                |
|      |               |           |           |                  |               |                  |             |               | 22         | 32894483  | GT<br>CG         |               | Del            | FBX07       | p.R399fs        | UC                          | frameshift         |                          |            |                                |            | 0.00003048                  |                |
| 10   | DLB           | 65        | 70        | 5                |               |                  |             | 3/3           | 6          | 41129207  | C                | T             | SNV            | TREM2       | p.R62H          | RF                          | missense           |                          |            | B                              | 11.11      |                             | 0.826          |
|      |               |           |           |                  |               |                  |             |               | 6          | 161771219 | G                | A             | SNV            | PARK2       | p.P409L         | PR                          | missense           | D                        | 0.01       | PrD                            | 27.7       | 0.0001127                   | 0.15           |
|      |               |           |           |                  |               |                  |             |               | 12         | 40713899  | T                | C             | SNV            | LRRK2       | p.M1646T        | RF                          | missense           |                          |            | B                              | 17.91      | 0.00001683                  | 0.916          |
| 11   | DLB           | 52        | 68        | 16               |               | Neo              |             | 3/4           | 3          | 184043401 | G                | A             | SNV            | EIF4G1      | p.R1039Q        | US                          | missense           | T                        | 0.24       | B                              | 24.1       | 0.001589                    |                |
|      |               |           |           |                  |               |                  |             |               | 12         | 40713899  | T                | C             | SNV            | LRRK2       | p.M1646T        | RF                          | missense           |                          |            | B                              | 17.91      | 0.00001683                  | 0.916          |
| 12   | DLB           | 62        | 72        | 10               |               | Neo              |             | 3/3           | 1          | 20960395  | C                | A             | SNV            | PINK1       | p.S118R         | UC                          | missense           | T                        | 0.32       | B                              | 16.26      |                             |                |
|      |               |           |           |                  |               |                  |             |               | 1          | 155206037 | G                | A             | SNV            | GBA         | p.T321M         | RF                          | missense           | T                        | 0.11       | B                              | 22.2       |                             | 0.657          |



|    |     |    |    |    |            |     |    |           |           |   |     |        |          |          |          |          |      |      |       |            |             |       |
|----|-----|----|----|----|------------|-----|----|-----------|-----------|---|-----|--------|----------|----------|----------|----------|------|------|-------|------------|-------------|-------|
|    |     |    |    |    |            |     |    | 2         | 233712223 | T | C   | SNV    | GIGYF2   | p.L1230P | LB       | missense | T    | 0.23 | B     |            |             | 0.021 |
|    |     |    |    |    |            |     |    | 15        | 44949354  | C | T   | SNV    | SPG11    | p.V270I  | UC       | missense | T    | 0.09 | PoD   | 23.6       | 0.0001435   | 0.609 |
| 13 | PD  | 58 | 63 | 5  | Limbi<br>c | 3/4 | 6  | 41129252  | C         | T | SNV | TREM2  | p.R47H   | RF       | missense |          |      | PrD  | 33    |            | 0.000004074 | 0.206 |
|    |     |    |    |    |            |     | 12 | 40745375  | G         | T | SNV | LRRK2  | p.C2139F | UC       | missense |          |      | PrD  | 33    |            |             |       |
| 14 | DLB | 62 | 75 | 13 | Limbi<br>c | 3/3 | 1  | 155206167 | C         | T | SNV | GBA    | p.E278K  | RF       | missense | T        | 0.88 | B    | 17.33 |            |             | 0.979 |
|    |     |    |    |    |            |     | 17 | 42429839  | G         | C | SNV | GRN    | p.G515A  | UC       | missense | T        | 0.56 | B    |       |            |             |       |
| 15 | PD  |    | 76 |    | Bstem      | 3/4 | 6  | 161771219 | G         | A | SNV | PARK2  | p.P409L  | PR       | missense | D        | 0.01 | PrD  | 27.7  | 0.0001127  | 0.15        |       |
|    |     |    |    |    |            |     | 12 | 40713899  | T         | C | SNV | LRRK2  | p.M1646T | RF       | missense |          |      | B    | 17.91 | 0.00001683 | 0.916       |       |
| 16 | DLB | 65 | 66 | 1  |            | 3/4 | 1  | 155205043 | A         | G | SNV | GBA    | p.L434P  | RF       | missense | D        | 0.04 | PoD  | 24.8  | 0.0002443  | 0.31        |       |
|    |     |    |    |    |            |     | 17 | 42426585  | C         | T | SNV | GRN    | p.T18M   | LB       | missense | T        | 0.08 | PoD  | 25.8  |            |             |       |
| 17 | PD  | 66 | 69 | 3  | Limbi<br>c | 2/3 | 1  | 155205043 | A         | G | SNV | GBA    | p.L434P  | RF       | missense | D        | 0.04 | PoD  | 24.8  | 0.0002443  | 0.31        |       |
|    |     |    |    |    |            |     | 12 | 40677726  | G         | T | SNV | LRRK2  | p.S764I  | UC       | missense |          |      | B    | 16.12 |            |             |       |
| 18 | PD  | 63 | 70 | 7  | Limbi<br>c | 3/4 | 6  | 162206852 | G         | A | SNV | PARK2  | p.R275W  | PR       | missense | D        | 0    | PrD  | 34    | 0.006412   | 0.206       |       |
|    |     |    |    |    |            |     | 19 | 45412358  | C         | G | SNV | APOE   | p.R269G  | UC       | missense | D        | 0.01 | B    | 25.6  |            |             |       |
| 19 | PD  | 40 | 69 | 29 | Limbi<br>c | 3/4 | 6  | 41129100  | G         | A | SNV | TREM2  | p.R98W   | RF       | missense |          |      | PoD  | 25.2  |            |             | 0.007 |
|    |     |    |    |    |            |     | 6  | 161771240 | C         | T | SNV | PARK2  | p.G430D  | PR       | missense | D        | 0    | PrD  | 33    | 0.0001127  | 0.011       |       |
|    |     |    |    |    |            |     | 6  | 162206852 | G         | A | SNV | PARK2  | p.R275W  | PR       | missense | D        | 0    | PrD  | 34    | 0.006412   | 0.206       |       |
| 20 | PD  | 54 | 64 | 10 | Neo        | 3/4 | 2  | 233712223 | T         | C | SNV | GIGYF2 | p.L1230P | LB       | missense | T        | 0.23 | B    |       |            |             | 0.021 |
|    |     |    |    |    |            |     | 12 | 40713899  | T         | C | SNV | LRRK2  | p.M1646T | RF       | missense |          |      | B    | 17.91 | 0.00001683 | 0.916       |       |
| 21 | DLB |    | 94 |    | Neo        | 3/4 | 1  | 227076537 | C         | A | SNV | PSEN2  | p.L192I  | US       | missense | T        | 0.15 | B    | 25.4  |            |             |       |
|    |     |    |    |    |            |     | 6  | 41129207  | C         | T | SNV | TREM2  | p.R62H   | RF       | missense |          |      | B    | 11.11 |            |             |       |
| 22 | DLB |    | 80 |    | Neo        | 3/3 | 3  | 184039828 | C         | T | SNV | EIF4G1 | p.P399S  | LB       | missense | T        | 1    | B    |       |            |             | 0.079 |
|    |     |    |    |    |            |     | 6  | 41129207  | C         | T | SNV | TREM2  | p.R62H   | RF       | missense |          |      | B    | 11.11 |            |             |       |
| 23 | DLB |    | 74 |    | Neo        | 3/3 | 1  | 155205043 | A         | G | SNV | GBA    | p.L434P  | RF       | missense | D        | 0.04 | PoD  | 24.8  | 0.0002443  | 0.31        |       |
|    |     |    |    |    |            |     | 2  | 74759825  | G         | A | SNV | HTRA2  | p.G399S  | UC       | missense | D        | 0.02 | PrD  | 24.1  | 0.00052    | 0.437       |       |

**Supplementary table 9.** Variants in PD-DLB cases with >1 variant in the full gene panel (28 genes) at a threshold of 1% MAF. The age of onset, death and disease duration is shown where available, together with all variant data. Key – ACMG – American College of Medical Genetics, B- Benign, LB – Likely Benign, UC – Unclassified, US – Uncertain Significance, RF – Risk Factor, PR – Pathogenic Recessive, LP – Likely Pathogenic, P – Pathogenic, T – Tolerated, D - Deleterious. Cases highlighted in blue type indicate those individuals with >1 pathogenic, likely pathogenic or known risk factor for a neurodegenerative disease based on ACMG criteria.



## REFERENCES

1. Braak H, Alafuzoff I, Arzberger T, et al. Staging of Alzheimer disease-associated neurofibrillary pathology using paraffin sections and immunocytochemistry. *Acta neuropathologica* 2006;**112**(4):389-404 doi: 10.1007/s00401-006-0127-z[published Online First: Epub Date]].
2. Keogh MJ, Wei W, Wilson I, et al. Genetic compendium of 1511 human brains available through the UK Medical Research Council Brain Banks Network Resource. *Genome Res* 2017;**27**(1):165-73 doi: 10.1101/gr.210609.116[published Online First: Epub Date]].
3. Langmead B, Trapnell C, Pop M, et al. Ultrafast and memory-efficient alignment of short DNA sequences to the human genome. *Genome Biol* 2009;**10**(3):R25 doi: 10.1186/gb-2009-10-3-r25[published Online First: Epub Date]].
4. Garrison EM, G. Haplotype-based variant detection from shortread sequencing. arXiv 2012:1207.3907v2
5. Genomes Project C, Abecasis GR, Auton A, et al. An integrated map of genetic variation from 1,092 human genomes. *Nature* 2012;**491**(7422):56-65 doi: 10.1038/nature11632[published Online First: Epub Date]].
6. Exome\_Variant\_Server. NHLBI GO Exome Sequencing Project (ESP). Secondary NHLBI GO Exome Sequencing Project (ESP) 2016. <http://evs.gs.washington.edu/EVS/>.
7. NHLBI GO Exome Sequencing Project (ESP). Secondary NHLBI GO Exome Sequencing Project (ESP). URL: <http://evs.gs.washington.edu/EVS/>.
8. Lek M, Karczewski KJ, Minikel EV, et al. Analysis of protein-coding genetic variation in 60,706 humans. *Nature* 2016;**536**(7616):285-91 doi: 10.1038/nature19057[published Online First: Epub Date]].
9. Exome Aggregation Consortium (ExAC). Secondary Exome Aggregation Consortium (ExAC). <http://exac.broadinstitute.org>.
10. Richards S, Aziz N, Bale S, et al. Standards and guidelines for the interpretation of sequence variants: a joint consensus recommendation of the American College of Medical Genetics and Genomics and the Association for Molecular Pathology. *Genetics in medicine : official journal of the American College of Medical Genetics* 2015;**17**(5):405-24 doi: 10.1038/gim.2015.30[published Online First: Epub Date]].
11. MacArthur DG, Manolio TA, Dimmock DP, et al. Guidelines for investigating causality of sequence variants in human disease. *Nature* 2014;**508**(7497):469-76 doi: 10.1038/nature13127[published Online First: Epub Date]].
12. Cady J, Allred P, Bali T, et al. Amyotrophic lateral sclerosis onset is influenced by the burden of rare variants in known amyotrophic lateral sclerosis genes. *Annals of neurology* 2015;**77**(1):100-13 doi: 10.1002/ana.24306[published Online First: Epub Date]].
13. Renton AE, Majounie E, Waite A, et al. A hexanucleotide repeat expansion in C9ORF72 is the cause of chromosome 9p21-linked ALS-FTD. *Neuron* 2011;**72**(2):257-68 doi: 10.1016/j.neuron.2011.09.010[published Online First: Epub Date]].
14. Conte A, Lattante S, Zollino M, et al. P525L FUS mutation is consistently associated with a severe form of juvenile amyotrophic lateral sclerosis.

- Neuromuscular disorders : NMD 2012;**22**(1):73-5 doi:  
10.1016/j.nmd.2011.08.003[published Online First: Epub Date]].
15. Leblond CS, Webber A, Gan-Or Z, et al. De novo FUS P525L mutation in Juvenile amyotrophic lateral sclerosis with dysphonia and diplopia. *Neurology. Genetics* 2016;**2**(2):e63 doi:  
10.1212/NXG.0000000000000063[published Online First: Epub Date]].
16. Rosen DR, Siddique T, Patterson D, et al. Mutations in Cu/Zn superoxide dismutase gene are associated with familial amyotrophic lateral sclerosis. *Nature* 1993;**362**(6415):59-62 doi: 10.1038/362059a0[published Online First: Epub Date]].
