# Supplementary material for: Oligogenic genetic variation of neurodegenerative disease genes in 980 postmortem human brains
Source: PubMed Central journal article supplement (PMC6204946; doi:10.1136/jnnp-2017-317234), 2018-01-13
Supplement: jnnp-2017-317234supp002.pdf [file jnnp-2017-317234supp002.pdf]

# Modelling Oligovariants and Monogenicity with the Categorical Distribution

## 1. Model

Let us assume that we are presented with a case patient, with a state  $X \in \{1, 2, 3, 4\}$  where

$$X = 1 \implies \text{“> 1 variant and monogenic”} \tag{1}$$

$$X = 2 \implies \text{“> 1 variant and not monogenic”} \tag{2}$$

$$X = 3 \implies \text{“}\leq 1 \text{ variant and monogenic”} \tag{3}$$

$$X = 4 \implies \text{“}\leq 1 \text{ variant and not monogenic”}. \tag{4}$$

We can model this as each patient being a roll of a 4-sided die with outcome  $X$ . Note that  $X$  here is a random variable. Given  $N$  observed patients, we wish to make predictions about the probability that a new patient will be in one of the above categories. To do this, we take a Bayesian approach as outlined in [1].

## 2. Likelihood

We begin by writing down the likelihood for a categorical distribution, which is a model for a  $K$ -sided die (a higher-dimensional analogue of the Bernoulli distribution for a coin flip)

$$\mathbb{P}(\mathcal{D}|\boldsymbol{\theta}) = \prod_{k=1}^4 \theta_k^{N_k} \tag{5}$$

where  $\theta_k$  is the probability of outcome  $k$  (where  $k \in \{1, \dots, 4\}$ ),  $N_k$  is the number of patients observed with outcome  $k$  and  $\mathcal{D} = \{N_1, \dots, N_4\}$  is the data.  $\boldsymbol{\theta}$  is the set of all parameters  $\theta_k$ . Hence the probability of observing the entire dataset is simply the product of probabilities for each individual outcome.

## 3. Priors

In order to access the posterior, which is the quantity of interest here ( $\mathbb{P}(\boldsymbol{\theta}|\mathcal{D})$ ), we require a prior  $\mathbb{P}(\boldsymbol{\theta})$  which encodes our belief about the parameters we wish to infer ( $\boldsymbol{\theta}$ ) before we see any data.

For mathematical convenience, we choose the prior to be a Dirichlet distribution

$$\text{Dir}(\boldsymbol{\theta}|\boldsymbol{\alpha}) = \frac{1}{B(\boldsymbol{\alpha})} \prod_{k=1}^K \theta_k^{\alpha_k - 1} \mathbb{I}(\boldsymbol{\theta} \in S_K) \quad (6)$$

$$S_K = \{\boldsymbol{\theta} : 0 \leq \theta_k \leq 1, \sum_{k=1}^K \theta_k = 1\} \quad (7)$$

$$B(\boldsymbol{\alpha}) \equiv \frac{\prod_{k=1}^K \Gamma(\alpha_k)}{\Gamma(\alpha_0)} \quad (8)$$

$$\alpha_0 \equiv \sum_{k=1}^K \alpha_k \quad (9)$$

where  $\Gamma(x)$  is the gamma-function and  $\mathbb{I}(z)$  is the indicator function. Although the Dirichlet distribution appears to be complex, it is a natural class of distribution to describe the probabilities of a weighted die. The reason for this is that the distribution is constrained such that the sum of probabilities of each possible outcome ( $\theta_k$ ) is exactly 1 (see Eq.(7)). The shape of the Dirichlet distribution may be tuned to encode our belief on  $\boldsymbol{\theta}$  by appropriately choosing  $\boldsymbol{\alpha}$ . We choose  $\boldsymbol{\alpha} = (1, 1, 1, 1)$  which is a multidimensional uniform prior on the space  $S_K$  (this is called an ‘‘uninformative’’ prior).

#### 4. Posterior

Our choice of prior is convenient because it is a *conjugate* prior. In other words, the data simply changes the parameters of the prior, whilst retaining its family (namely the Dirichlet distribution). It can be shown [1] that

$$\mathbb{P}(\boldsymbol{\theta}|\mathcal{D}) = \text{Dir}(\boldsymbol{\theta}|\alpha_1 + N_1, \dots, \alpha_K + N_K). \quad (10)$$

Given the data  $\mathcal{D} = \{N_1 = 7, N_2 = 1, N_3 = 29, N_4 = 240\}$ , and our prior, the posterior distribution is therefore

$$\mathbb{P}(\boldsymbol{\theta}|\mathcal{D}) = \text{Dir}(\boldsymbol{\theta}|\alpha_1 = 8, \alpha_2 = 2, \alpha_3 = 30, \alpha_4 = 241). \quad (11)$$

This distribution encodes all of the uncertainty given the data. We may use this to make predictions about future patients.

#### 5. Posterior predictive

##### 5.1. Classifying a patient in any category

We may be interested in the probability that a future patient falls into one of the above categories, i.e.  $\mathbb{P}(X = j|\mathcal{D})$ . To do this, we wish to integrate over our parametric uncertainty in  $\boldsymbol{\theta}$ . We can do this by using the posterior distribution

$$\mathbb{P}(X = j|\mathcal{D}) = \int \mathbb{P}(X = j|\boldsymbol{\theta})\mathbb{P}(\boldsymbol{\theta}|\mathcal{D})d\boldsymbol{\theta} \quad (12)$$

where  $\mathbb{P}(X = j|\boldsymbol{\theta})$  is simply  $\theta_j$ . It turns out that this takes a particularly intuitive form

$$\mathbb{P}(X = j|\mathcal{D}) = \frac{\alpha_j + N_j}{\alpha_0 + N}. \quad (13)$$

In other words, the probability that a future patient will be given a particular classification is the fraction of times a patient has already been given that classification, with some correction terms from the prior. These correction terms allow for the possibility of  $N_j = 0$  and still give  $\mathbb{P}(X = j|\mathcal{D}) > 0$ ,

hence solving the zero-count problem. Note that for small amounts of data the prior has a more dominant role in the posterior predictive probability. For  $j = 1$ , we have

$$\mathbb{P}(X = 1|\mathcal{D}) = \frac{1 + 7}{4 + 277} = 0.03\% \text{ (1 s.f.)} \quad (14)$$

## 5.2. Predicting monogenicity given oligovariants

In this case, we are interested in a slightly different object, namely the probability that  $X = 1$  (monogenic and has  $>1$  variants) given that  $X = 1$  or  $2$  (has  $> 1$  variants) and the data. We can solve for this using Bayes rule

$$\mathbb{P}(X = 1|X \in \{1, 2\}, \mathcal{D}) = \frac{\mathbb{P}(X \in \{1, 2\}|X = 1, \mathcal{D})\mathbb{P}(X = 1|\mathcal{D})}{\mathbb{P}(X \in \{1, 2\}|\mathcal{D})} \quad (15)$$

but  $\mathbb{P}(X \in \{1, 2\}|X = 1, \mathcal{D}) = 1$  and  $\mathbb{P}(X \in \{1, 2\}|\mathcal{D}) = \mathbb{P}(X = 1|\mathcal{D}) + \mathbb{P}(X = 2|\mathcal{D})$  since the events are disjoint (a patient cannot be classified as both  $X = 1$  and  $X = 2$ ). Hence, by using Eq.(13), we find that

$$\mathbb{P}(X = 1|X \in \{1, 2\}, \mathcal{D}) = \frac{\alpha_1 + N_1}{\alpha_1 + \alpha_2 + N_1 + N_2} \quad (16)$$

which is again intuitive in its form. In our case

$$\mathbb{P}(X = 1|X \in \{1, 2\}, \mathcal{D}) = \frac{1 + 7}{1 + 1 + 7 + 1} = 80\%. \quad (17)$$

**Therefore the Bayesian posterior predictive probability that a patient showing multiple variants is monogenic is 80%, given a uniform prior distribution.**

## References

- [1] **Murphy KP**. 2012. *Machine learning: a probabilistic perspective*. MIT press.
